# Supplementary material for: Oriented quasi-domain structure of helical spin polymers prepared by electrochemical polymerization in a cholesteric liquid crystal under a magnetic field, showing a helical stripe magnetic domain
Source: Royal Society of Chemistry journal article supplement (doi:10.1039/d3ma00161j), 2023-01-01
Supplement: d3ma00161j1.pdf [file d3ma00161j1.pdf]

## Supplementary Information

Oriented quasi-domain structure of helical spin polymer prepared by electrochemical polymerization in cholesteric liquid crystal under magnetic field, showing helical stripes magnetic domain

Masashi Otaki<sup>a</sup>, Shigeki Nimori<sup>b</sup>, and Hiromasa Goto<sup>a,\*</sup>

<sup>a</sup>Department of Materials Science, Faculty of Pure and Applied Sciences, University of Tsukuba,

Tsukuba, Ibaraki 305-8573, Japan

<sup>b</sup>National Institute for Materials Science, Tsukuba, Ibaraki, 305-0003, Japan

\*Correspondence to H. Goto, e-mail: [gotoh@ims.tsukuba.ac.jp](mailto:gotoh@ims.tsukuba.ac.jp)

|         |                |                                                                 |
|---------|----------------|-----------------------------------------------------------------|
| p2      | Scheme S1      | Synthetic route of monomers                                     |
| p3–p8   |                | Synthetic procedure of monomers                                 |
| P9–p19  | Figure S1–S14  | <sup>1</sup> H NMR of monomers                                  |
| P20     | Figure S15     | FT-IR spectra of monomers                                       |
| P21     | Figure S16     | CD and UV–vis absorption spectra of the polymer films           |
| P22–p23 | Figure S17–S18 | POM images of polymer films                                     |
| P23     | Figure S19     | UV–vis absorption spectra of magnetically aligned polymer films |
| P24     | Figure S20–S21 | CV measurement of polymer films                                 |
| P26     | Figure S22     | <i>In-situ</i> optical absorption spectra at different voltage  |
| S27     | Figure S23     | Plausible helical structure of polymer films                    |
| P27     |                | Reference                                                       |

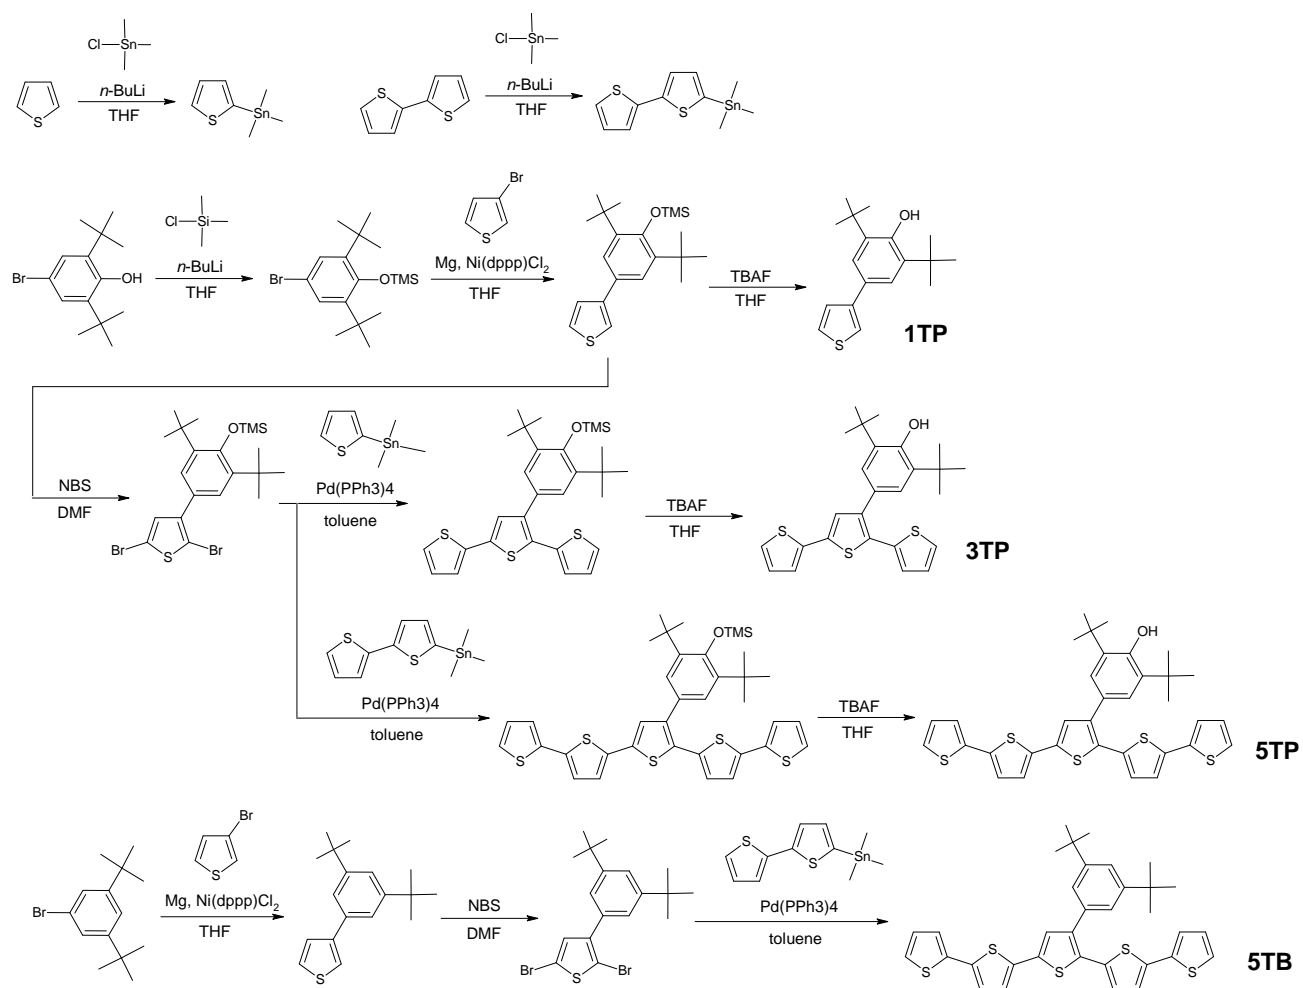

**Scheme S1.** Synthetic route of monomers. THF: tetrahydrofuran.  $n\text{-BuLi}$ :  $n$ -butyllithium. NBS:  $N$ -Bromosuccinimide.  $\text{Ni(dppp)Cl}_2$ : [1,3-Bis(diphenylphosphino)propane]nickel(II) dichloride.  $\text{Pd(PPh}_3)_4$ : tetrakis(triphenylphosphine)palladium(0). DMF:  $N,N$ -dimethylformamide.

### **Synthesis of 5-trimethyltin-thiophene:**

This synthesis was carried out according to a previously reported method<sup>[1]</sup>. Quantities used: 2-Bromothiophene (3.0 g, 18.4 mmol), *n*-butyllithium (11.5 mL, 18.4 mmol), trimethyltin chloride (3.67 g, 18.4 mmol), THF (70 mL). The crude product (brown liquid) was used in the next step without purification.

### **Synthesis of 5-trimethyltin-2,2'-bithiophene:**

This synthesis was carried out according to a previously reported method<sup>[2]</sup>. Quantities used: Bithiophene (4.5 g, 27.07 mmol), *n*-butyllithium (17 mL, 27.07 mmol), trimethyltin chloride (5.39 g, 27.07 mmol), THF (50 mL). The crude product (brown liquid) was used in the next step without purification.

### **Synthesis of (2,6-di-*tert*-butyl-4-bromophenoxy)trimethylsilane:**

This synthesis was carried out according to a previously reported method<sup>[3]</sup>. Quantities used: 2,6-Di-*tert*-butyl-4-bromophenol (5.01 g, 17.6 mmol), *n*-butyllithium (16.5 mL, 26.3 mmol, 1.6 M in hexane), chlorotrimethylsilane (3.55 g, 32.7 mmol), THF (70 mL). Yield = 92% (5.77 g, 16.1 mmol, white solid). <sup>1</sup>H NMR (400 MHz; CDCl<sub>3</sub>; TMS) δ 0.418 (s, 9H), 1.394 (s, 18H), 7.324 (s, 2H).

### **Synthesis of 3-(3,5-di-*tert*-butyl-4-trimethylsiloxyphenyl)thiophene:**

This synthesis was carried out according to a previously reported method<sup>[4,5]</sup>. Quantities used: Mg (0.31 g, 12.8 mmol), (2,6-di-*tert*-butyl-4-bromophenoxy)trimethylsilane (3.50 g, 9.8 mmol), 3-bromothiophene (1.95 g, 11.9 mmol), [1,3-bis(diphenylphosphino)propane]nickel(II) chloride (NiCl<sub>2</sub>(dppp), 0.044 g, 0.081 mmol), THF (30 mL). Yield = 45% (2.07 g, 5.75 mmol, white solid). <sup>1</sup>H NMR (400 MHz; CDCl<sub>3</sub>; TMS) δ 0.453 (s, 9H), 1.47 (s, 18H), 7.36 (m, 3H), 7.493 (s, 2H).

### Synthesis of 3-(3,5-di-*tert*-butyl-4-hydroxyphenyl)thiophene (1TP):

Under argon atmosphere, 3-(3,5-di-*tert*-butyl-4-trimethylsiloxyphenyl)thiophene (100 mg, 0.277 mmol) and tetrabutylammonium fluoride (1 M in THF, 0.55 mL, 0.55 mmol) in THF (6 mL) were added to an over-dried 50 mL round-bottom flask equipped with a stir-bar and stirred for 4 h at room temperature. After that, the reaction mixture was poured into water and extracted with ethyl acetate. The organic layer was washed with water and dried over MgSO<sub>4</sub>. The solvent was evaporated. The product was purified by column chromatography (silica gel, eluent: hexane) to afford the desired product (64.0 mg, 0.222 mmol, Yield: 80%, white solid). <sup>1</sup>H NMR (400 MHz; CDCl<sub>3</sub>; TMS) δ 1.485 (s, 18H), 5.211 (s, 1H), 7.286–7.298 (q, 1H, *J* = 1.6 Hz), 7.307–7.325 (dd, 1H, *J* = 2.4 Hz), 7.337–7.358 (q, 1H, *J* = 2.8 Hz), 7.382 (s, 2H). <sup>13</sup>C NMR (100 MHz, CDCl<sub>3</sub>): δ 153.4, 143.5, 136.3, 127.6, 126.7, 125.9, 123.6, 118.8, 34.5, 30.4. LC-MS (m/z): [M + H]<sup>+</sup> calcd. for C<sub>18</sub>H<sub>24</sub>OS, 288.45; found, 289.6.

### Synthesis of 2,5-dibromo-3-(3,5-di-*tert*-butyl-4-trimethylsiloxyphenyl)thiophene:

This synthesis was carried out according to a previously reported method<sup>[4,5]</sup>. Quantities used: 3-(3,5-Di-*tert*-butyl-4-trimethylsiloxyphenyl)thiophene (2.73 g, 7.58 mmol), *n*-bromosuccinimide (NBS, 2.97 g, 16.68 mmol), DMF (50 mL). Yield = 38% (1.51 g, 2.91 mmol, white solid). <sup>1</sup>H NMR (400 MHz; CDCl<sub>3</sub>; TMS) δ 0.511 (s, 9H), 1.511 (s, 18H), 7.099 (m, 1H), 7.49 (s, 2H).

### Synthesis of 3'-(3,5-di-*tert*-butyl-4-trimethylsiloxyphenyl)-2,2':5',2''-terthiophene:

Under argon atmosphere, 2,5-dibromo-3-(3,5-di-*tert*-butyl-4-trimethylsiloxyphenyl)thiophene (919 mg, 1.77 mmol) and 5-trimethyltin-thiophene (1314 mg, 5.33 mmol) in toluene (8 mL) were added to an over-dried 50 mL round-bottom flask equipped with a stir-bar and stirred for 0.5 h. Then, tetrakis(triphenylphosphine)palladium(0) (51.0 mg, 0.0443 mmol) was added to this solution and stirred under reflux at 100 °C for 48 h. After that, the reaction mixture was poured into water and extracted with ethyl acetate. The organic layer was washed with water and dried over MgSO<sub>4</sub>. The solvent was evaporated. The product was purified by column chromatography (silica gel, eluent: hexane) to afford the desired product (67.4 mg, 0.128 mmol, Yield: 7.3%, light yellow solid). <sup>1</sup>H NMR (400 MHz; CDCl<sub>3</sub>; TMS) δ 0.451

(s, 9H), 1.389 (d, 18H,  $J = 11.6$  Hz), 6.913–7.043 (m, 4H), 7.101 (quartet, 1H,  $J = 3.3$  Hz), 7.175 (d, 2H,  $J = 4.8$  Hz), 7.301 (s, 2H).

#### **Synthesis of 3'-(3,5-di-*tert*-butyl-4-phenoxy)-2,2':5',2''-terthiophene (3TP):**

Under argon atmosphere, 3'-(3,5-di-*tert*-butyl-4-trimethylsiloxyphenyl)-2,2':5',2''-terthiophene (67.4 mg, 0.128 mmol) and tetrabutylammonium fluoride (1 M in THF, 0.25 mL, 0.25 mmol) in THF (3 mL) were added to an over-dried 50 mL round-bottom flask equipped with a stir-bar and stirred for 4 h at room temperature. After that, the reaction mixture was poured into water and extracted with ethyl acetate. The organic layer was washed with water and dried over  $\text{MgSO}_4$ . The solvent was evaporated. The product was purified by column chromatography (silica gel, eluent: hexane) to afford the desired product (35 mg, 0.0773 mmol, Yield: 60%, light yellow solid).  $^1\text{H}$  NMR (400 MHz;  $\text{CDCl}_3$ ; TMS)  $\delta$  1.445 (d, 18H,  $J = 10.4$  Hz), 5.308 (s, 1H), 6.952 (dd, 1H,  $J = 3.6$  Hz), 6.989 (d, 1H,  $J = 2.9$  Hz), 7.03 (d, 1H,  $J = 4$  Hz), 7.057 (m, 1H), 7.113 (tri, 1H,  $J = 1.5$  Hz), 7.154 (d, 2H,  $J = 3.1$  Hz), 7.191 (s, 2H), 7.239 (s, 1H).  $^{13}\text{C}$  NMR (100 MHz,  $\text{CDCl}_3$ ):  $\delta$  153.5, 140.6, 136.2, 134.6, 128.2, 127.8, 126.6, 126.5, 124.6, 124.2, 123.6, 123.2, 34.5, 30.4. LC-MS (m/z):  $[\text{M} + \text{H}]^+$  calcd. for  $\text{C}_{26}\text{H}_{28}\text{OS}_3$ , 452.69; found, 453.8.

#### **Synthesis of 3''-(3,5-di-*tert*-butyl-4-trimethylsiloxyphenyl)-2,2':5',2'':5'',2''':5''',2''''-quinquethiophene:**

Under argon atmosphere, 2,5-dibromo-3-(3,5-di-*tert*-butyl-4-trimethylsiloxyphenyl)thiophene (162 mg, 0.313 mmol) and 5-trimethyltin-2,2'-bithiophene (226 mg, 0.688 mmol) in toluene (3 mL) were added to an over-dried 50 mL round-bottom flask equipped with a stir-bar and stirred for 0.5 h. Then, tetrakis(triphenylphosphine)palladium(0) (7.23 mg, 0.00626 mmol) was added to this solution and stirred under reflux at 75 °C for 24 h. After that, the reaction mixture was poured into water and extracted with ethyl acetate. The organic layer was washed with water and dried over  $\text{MgSO}_4$ . The solvent was evaporated. The product was purified by column chromatography (silica gel, eluent: hexane) to afford the desired product (22 mg, 0.0319 mmol, Yield: 10%, dark yellow solid).  $^1\text{H}$  NMR (400 MHz;  $\text{CDCl}_3$ ; TMS)  $\delta$  0.454 (s, 9H), 1.407 (s, 18H), 6.944 (d, 1H,  $J = 4.0$  Hz), 6.973 (dd, 1H,  $J = 1.6$  Hz), 6.996 (d, 1H,  $J = 4.0$  Hz), 7.036 (m, 2H), 7.116 (dd, 2H,  $J = 3.33$  Hz), 7.163 (s, 1H), 7.187 (m, 2H), 7.235 (dd, 1H,  $J = 1.87$  Hz), 7.301 (s, 2H).

**Synthesis of 3''-(3,5-di-*tert*-butyl-4-phenoxy)-2,2':5',2'':5'',2''':5''',2''''-quinquethiophene (5TP):**

Under argon atmosphere, 3''-(3,5-di-*tert*-butyl-4-trimethylsiloxyphenyl)-2,2':5',2'':5'',2''':5''',2''''-quinquethiophene (22 mg, 0.0319 mmol) and tetrabutylammonium fluoride (1 M in THF, 0.1 mL, 0.1 mmol) in THF (3 mL) were added to an over-dried 50 mL round-bottom flask equipped with a stir-bar and stirred for 4 h at room temperature. After that, the reaction mixture was poured into water and extracted with ethyl acetate. The organic layer was washed with water and dried over MgSO<sub>4</sub>. The solvent was evaporated. The product was purified by column chromatography (silica gel, eluent: hexane) to afford the desired product (15.7 mg, 0.0255 mmol, Yield: 80%, dark yellow solid). <sup>1</sup>H NMR (400 MHz; CDCl<sub>3</sub>; TMS) δ 1.445 (s, 18H), 5.304 (s, 1H), 6.952 (d, 1H, *J* = 3.6 Hz), 6.989 (dd, 1H, *J* = 2.9 Hz), 7.006 (d, 1H, *J* = 4 Hz), 7.037 (dd, 1H, *J* = 2.9 Hz), 7.061 (dd, 1H, *J* = 1.5 Hz), 7.116 (dd, 2H, *J* = 3.1 Hz), 7.144 (s, 1H), 7.192 (m, 2H), 7.236 (m, 1H), 7.242 (s, 2H). <sup>13</sup>C NMR (100 MHz, CDCl<sub>3</sub>): δ 153.9, 140.8, 137.2, 136.0, 134.6, 128.0, 127.9, 127.2, 126.9, 126.5, 126.2, 124.7, 124.5, 124.4, 123.9, 123.5, 123.4, 34.5, 30.4. LC-MS (*m/z*): [M + H]<sup>+</sup> calcd. for C<sub>34</sub>H<sub>32</sub>OS<sub>5</sub>, 616.94; found, 618.0.

**Synthesis of 3-(3,5-di-*tert*-butyl-phenyl)thiophene:**

Under argon atmosphere, Mg (0.542 g, 22.3 mmol) in THF (5 mL) was added to an over-dried 100 mL round-bottom flask equipped with a stir-bar. Then, this solution was slowly added dropwise to 1-bromo-3,5-di-*tert*-butyl-benzene (5.00 g, 18.6 mmol) in THF (5 mL) and stirred for 6 h at room temperature. After disappearance of Mg, this grignard suspension was added to a mixture of 3-bromothiophene (3.03 g, 18.6 mmol) and [1,3-bis(diphenylphosphino)propane]nickel(II) chloride (NiCl<sub>2</sub>(dppp), 0.065 g, 0.120 mmol) in THF (10 mL) and stirred under reflux for 12 h. When the reaction is completed, the reaction mixture poured into an aqueous sodium bicarbonate (NaHCO<sub>3</sub>) and extracted with ethyl acetate. The organic layer was washed with water and dried over MgSO<sub>4</sub>. The solvent was evaporated. The product was purified by column chromatography (silica gel, eluent: hexane) to afford the desired product (3.54 g, 13.0 mmol, Yield: 70%, colorless liquid). <sup>1</sup>H NMR (400 MHz; CDCl<sub>3</sub>; TMS) δ 1.409 (s, 18H), 7.394–7.433 (m, 3H, 2,4,5-*H*(thiophene)), 7.449–7.467 (m, 3H, 2,4,6-*H*(benzene)).

### Synthesis of 2,5-dibromo-3-(3,5-di-*tert*-butyl-phenyl)thiophene

Under argon atmosphere, 3-(3,5-di-*tert*-butyl-phenyl)thiophene (3.50 g, 12.9 mmol) in DMF (15 mL) was added to an over-dried 100 mL round-bottom flask equipped with a stir-bar. After that, NBS (5.71 g, 32.1 mmol) was slowly added to the solution at 0 °C and stirred 24 h at room temperature. Then, the mixture was poured into an aqueous sodium bicarbonate (NaHCO<sub>3</sub>) and extracted with ethyl acetate. The organic layer was washed with water and dried over MgSO<sub>4</sub>. The solvent was evaporated. The product was purified by column chromatography (silica gel, eluent: hexane) to afford the desired product (3.58 g, 8.32 mmol, Yield: 65%, white solid). <sup>1</sup>H NMR (400 MHz; CDCl<sub>3</sub>; TMS) δ 1.375 (s, 18H), 7.055 (s, 1H), 7.344 (d, 2H, *J* = 1.6 Hz), 7.434 (t, 1H, *J* = 1.8 Hz).

### Synthesis of 3''-(3,5-di-*tert*-butyl-phenyl)-2,2':5',2'':5'',2''':5''',2''''- quinquethiophene (5TB):

Under argon atmosphere, 2,5-dibromo-3-(3,5-di-*tert*-butyl-phenyl)thiophene (1.00 g, 2.32 mmol) and 5-trimethyltin-2,2'-bithiophene (1.68 g, 5.11 mmol) in toluene (10 mL) were added to an over-dried 100 mL round-bottom flask equipped with a stir-bar and stirred for 0.5 h. Then, tetrakis(triphenylphosphine)palladium(0) (53.0 mg, 0.0465 mmol) was added to this solution and stirred under reflux at 75 °C for 24 h. After that, the reaction mixture was poured into water and extracted with ethyl acetate. The organic layer was washed with water and dried over MgSO<sub>4</sub>. The solvent was evaporated. The product was purified by column chromatography (silica gel, eluent: hexane) to afford the desired product (145 mg, 0.241 mmol, Yield: 10%, dark yellow solid). <sup>1</sup>H NMR (400 MHz; CDCl<sub>3</sub>; TMS) δ 1.334 (s, 18H), 6.917 (d, 1H, *J* = 3.6 Hz), 6.982 (m, 2H), 7.041 (m, 2H), 7.122 (dd, 2H, *J* = 3.7 Hz), 7.166 (s, 1H), 7.192 (m, 2H), 7.237 (dd, 1H, *J* = 2.1 Hz), 7.278 (d, 2H, *J* = 2 Hz), 7.422 (t, 1H, *J* = 1.8 Hz). <sup>13</sup>C NMR (100 MHz, CDCl<sub>3</sub>): δ 151.0, 140.9, 137.3, 134.8, 134.7, 128.0, 127.2, 127.0, 124.7, 124.6, 124.5, 124.4, 123.9, 123.8, 123.7, 123.6, 121.7, 35.0, 31.5. LC-MS (m/z): [M + H]<sup>+</sup> calcd. for C<sub>34</sub>H<sub>32</sub>S<sub>5</sub>, 600.94; found, 602.0.



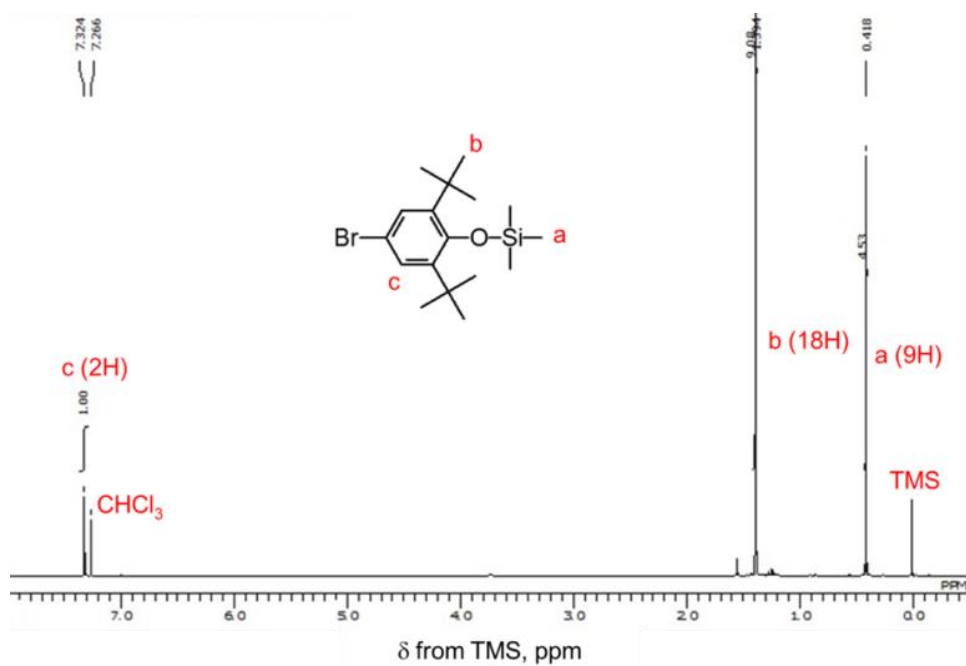

**Figure S1.**  $^1\text{H}$  NMR data for (2,6-di-*tert*-butyl-4-bromophenoxy)trimethylsilane in  $\text{CDCl}_3$ , at 400 MHz.

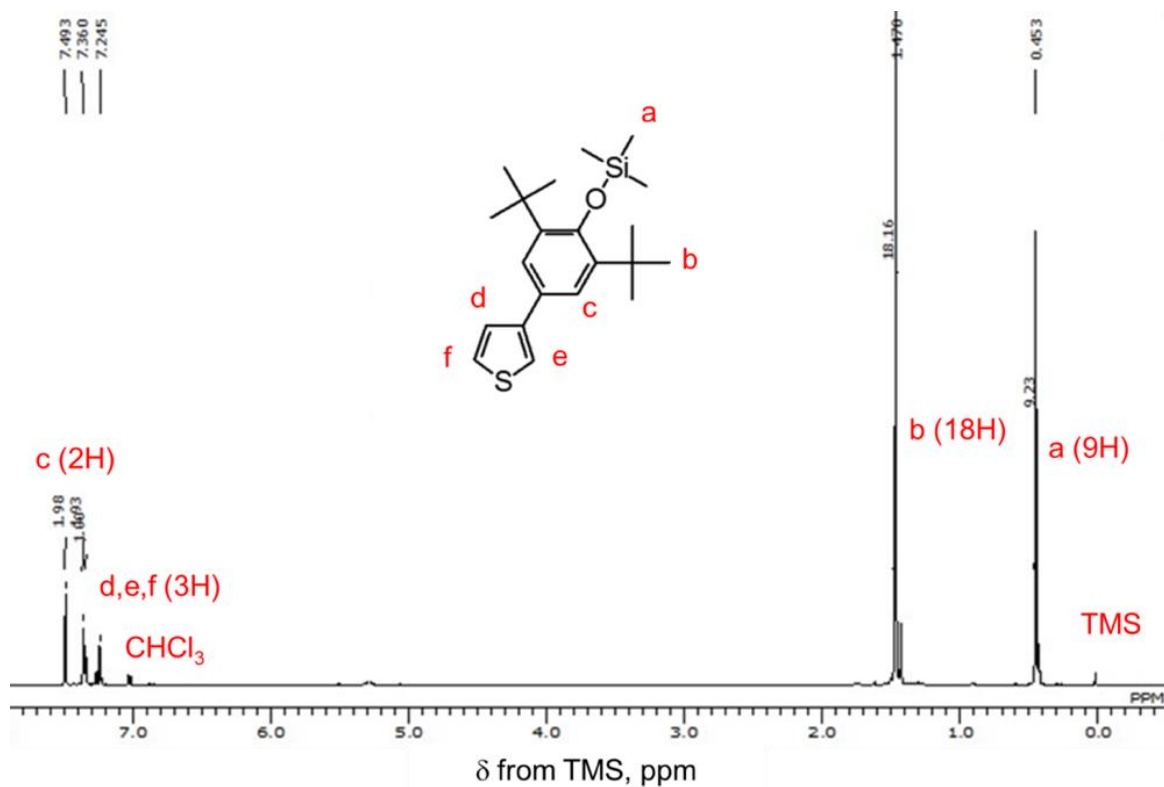

**Figure S2.**  $^1\text{H}$  NMR data for 3-(3,5-di-*tert*-butyl-4-trimethylsiloxyphenyl)thiophene in  $\text{CDCl}_3$ , at 400 MHz.

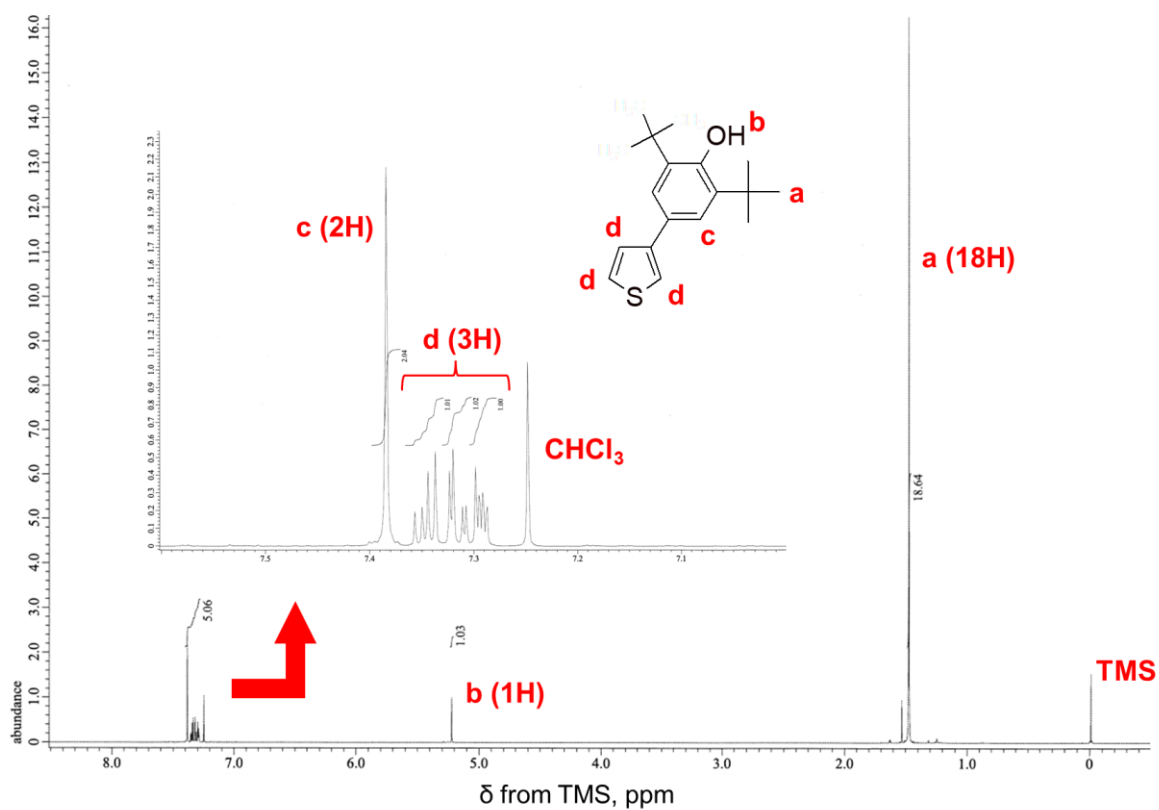

**Figure S3.**  $^1\text{H}$  NMR data for 3-(3,5-di-*tert*-butyl-4-hydroxyphenyl)thiophene (1TP) in  $\text{CDCl}_3$ , at 400 MHz.

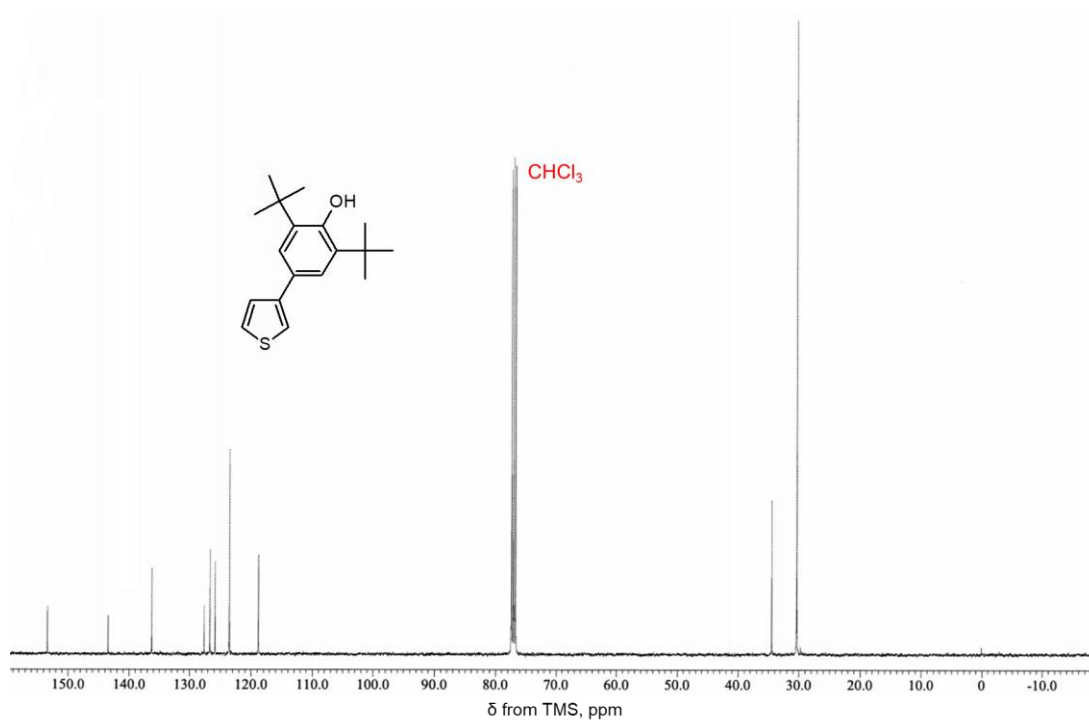

**Figure S4.**  $^{13}\text{C}$  NMR data for 3-(3,5-di-*tert*-butyl-4-hydroxyphenyl)thiophene (1TP) in  $\text{CDCl}_3$ , at 100 MHz.

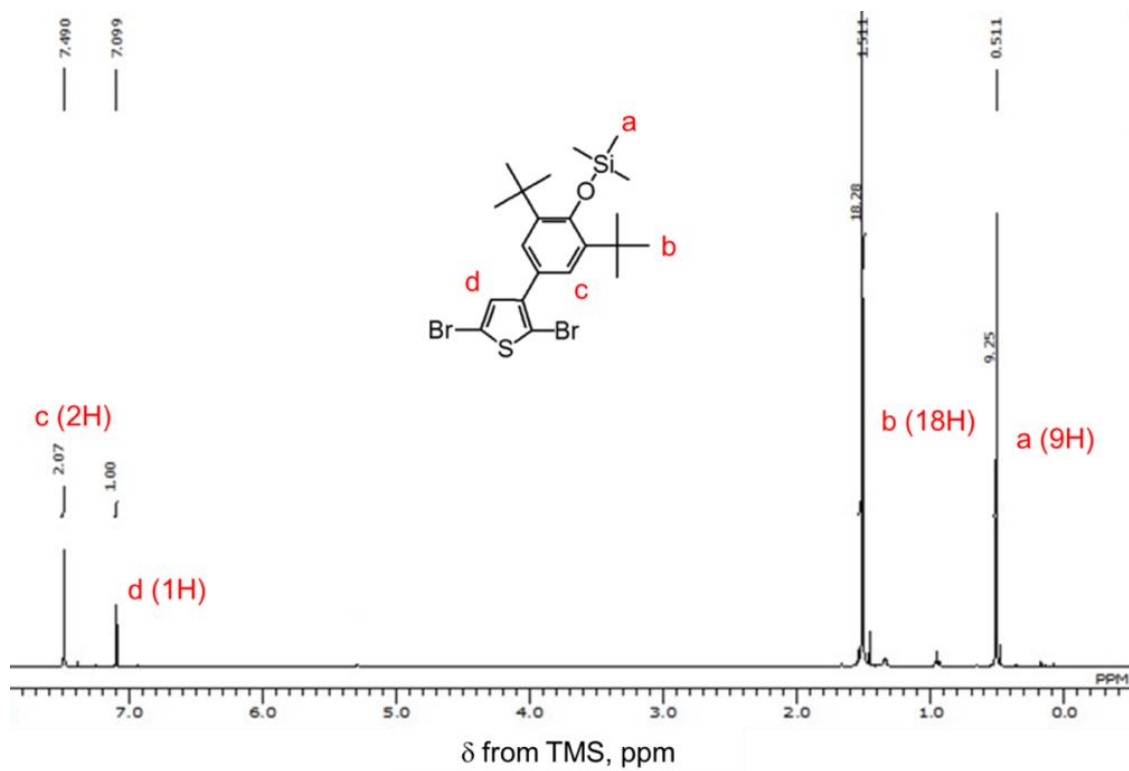

**Figure S5.**  $^1\text{H}$  NMR data for 2,5-dibromo-3-(3,5-di-*tert*-butyl-4-trimethylsiloxyphenyl)thiophene in  $\text{CDCl}_3$ , at 400 MHz.

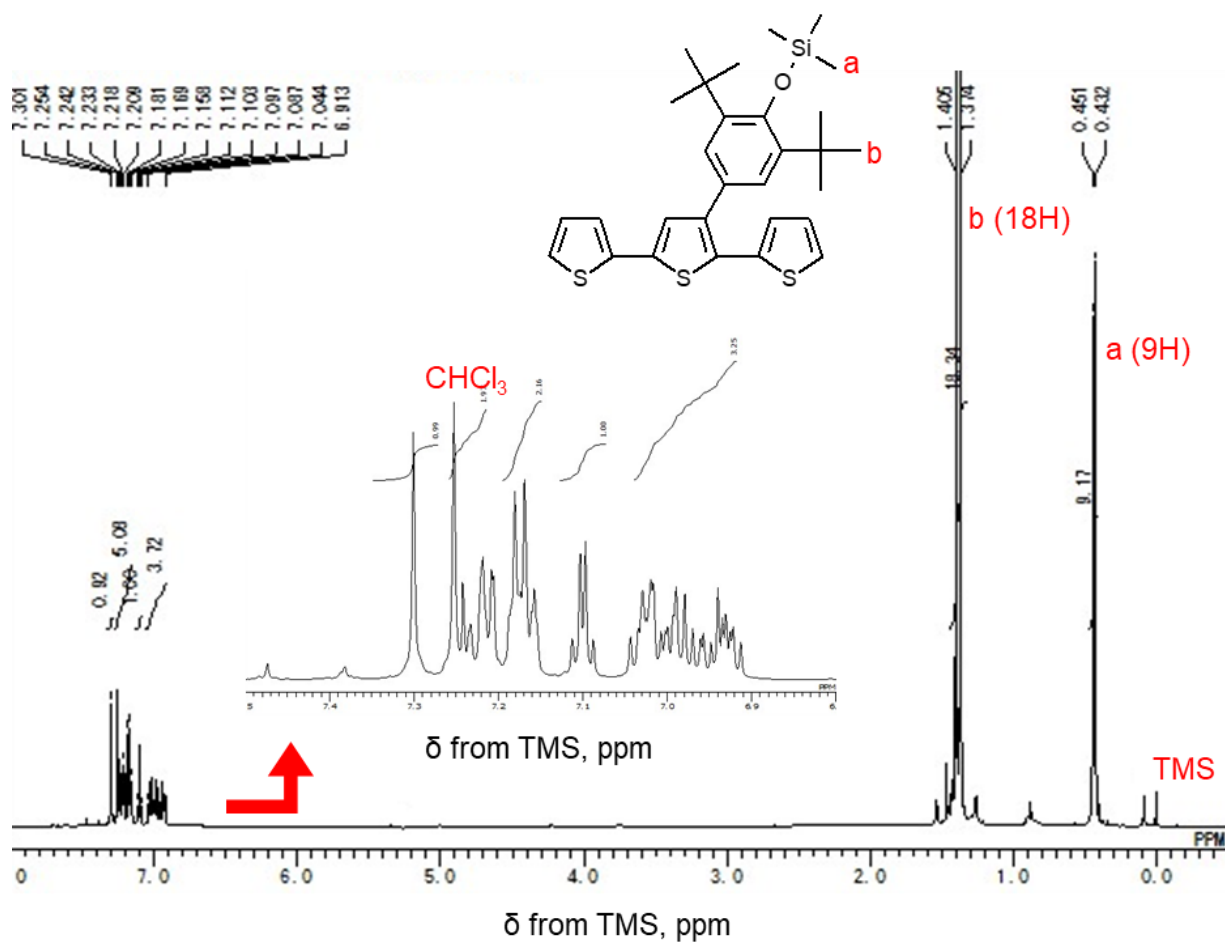

**Figure S6.** <sup>1</sup>H NMR data for 3'-(3,5-di-*tert*-butyl-4-trimethylsiloxyphenyl)-2,2':5',2''-terthiophene in CDCl<sub>3</sub>, at 400 MHz.

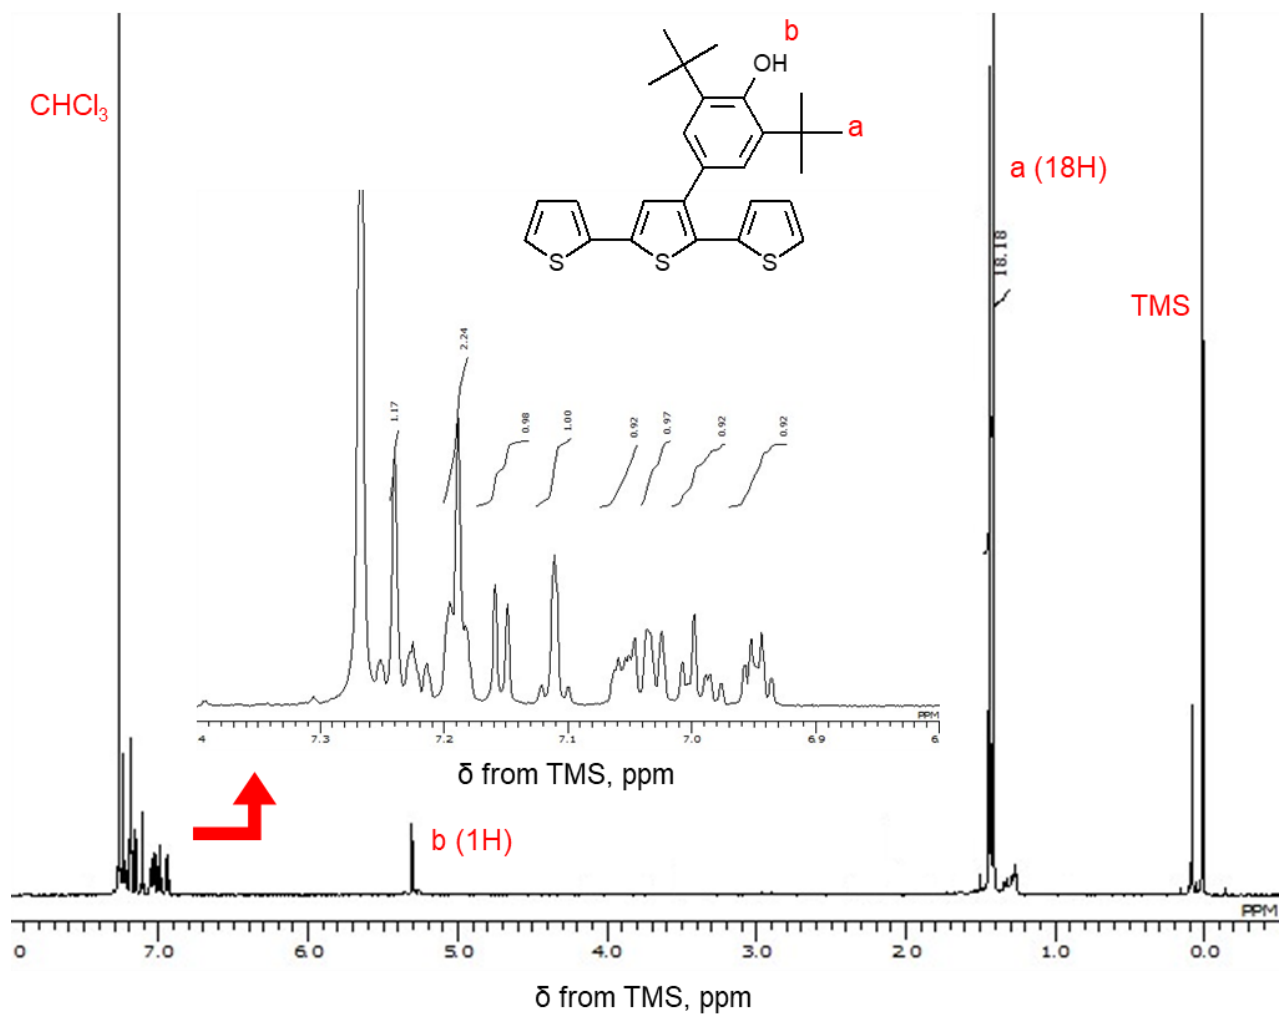

**Figure S7.** <sup>1</sup>H NMR data for 3'-(3,5-di-*tert*-butyl-4-phenoxy)-2,2':5',2''-terthiophene (3TP) in CDCl<sub>3</sub>, at 400 MHz.

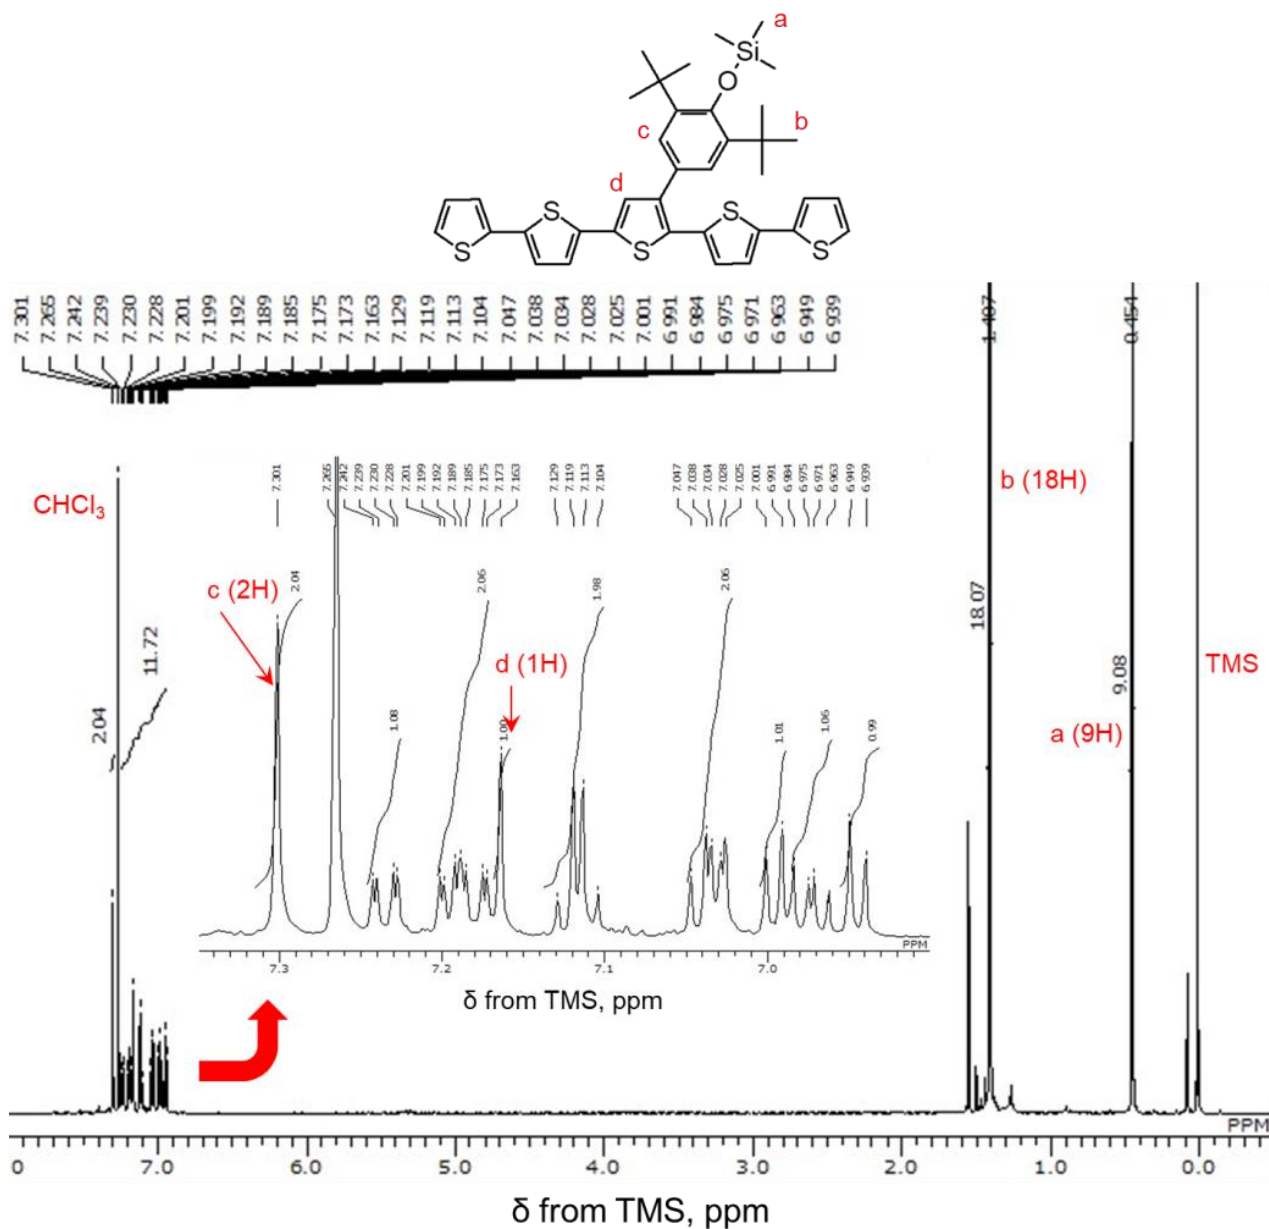

**Figure S8.** <sup>1</sup>H NMR data for 3''-(3,5-di-*tert*-butyl-4-trimethylsiloxyphenyl)-2,2':5',2'':5'',2''':5''',2''''-quinquethiophene in CDCl<sub>3</sub>, at 400 MHz.

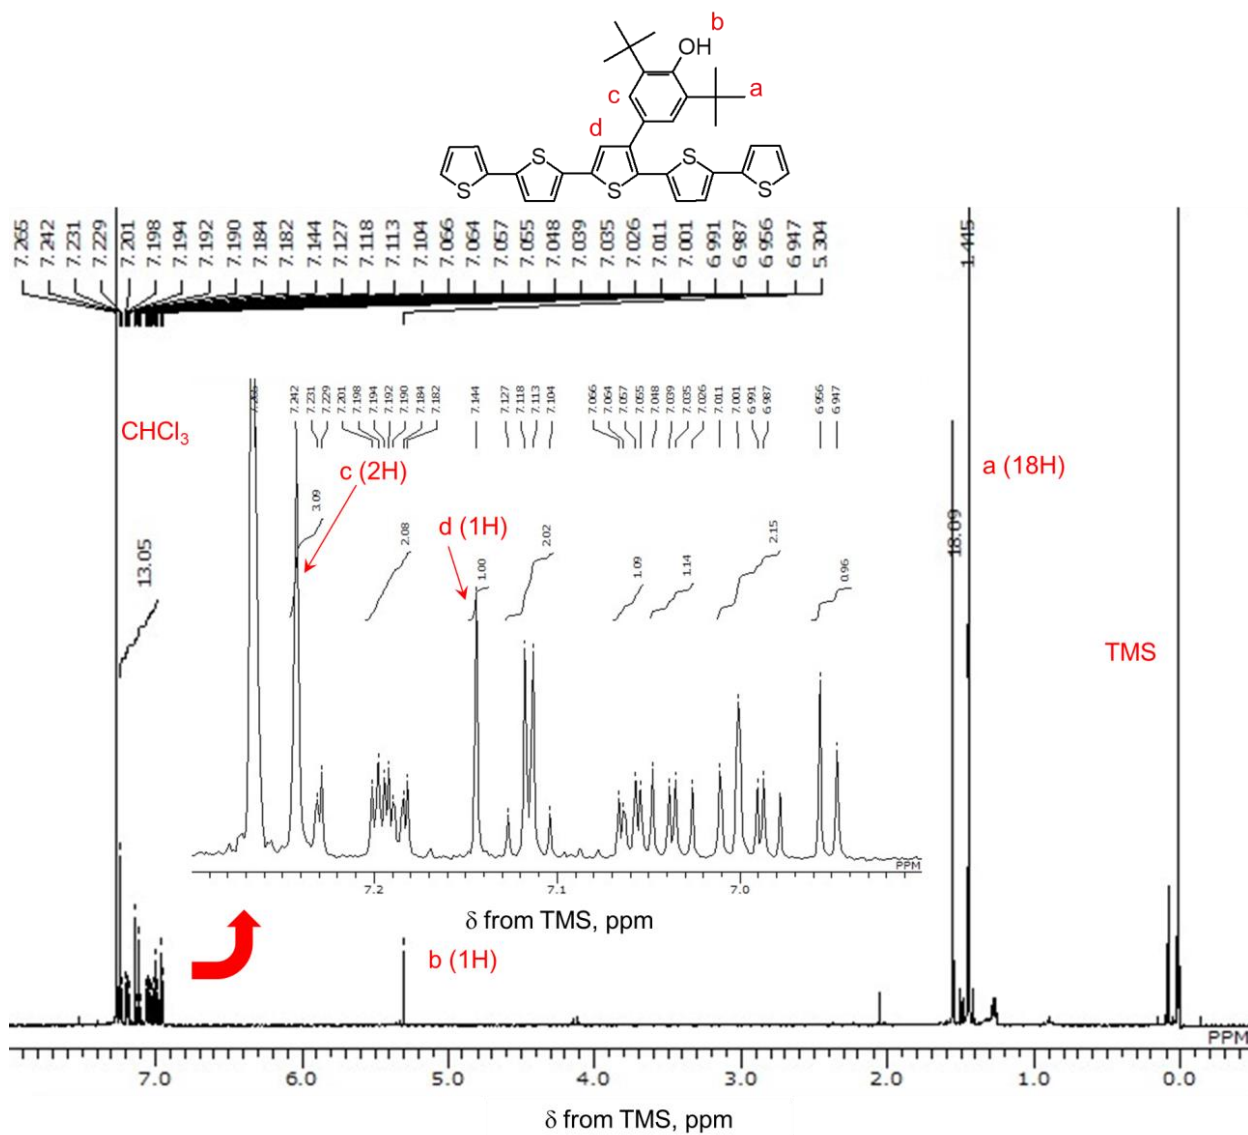

**Figure S9.** <sup>1</sup>H NMR data of 3''-(3,5-di-*tert*-butyl-4-phenoxy)-2,2':5',2'':5'',2''':5''',2''''-quinquethiophene (5TP) in CDCl<sub>3</sub>, at 400 MHz.

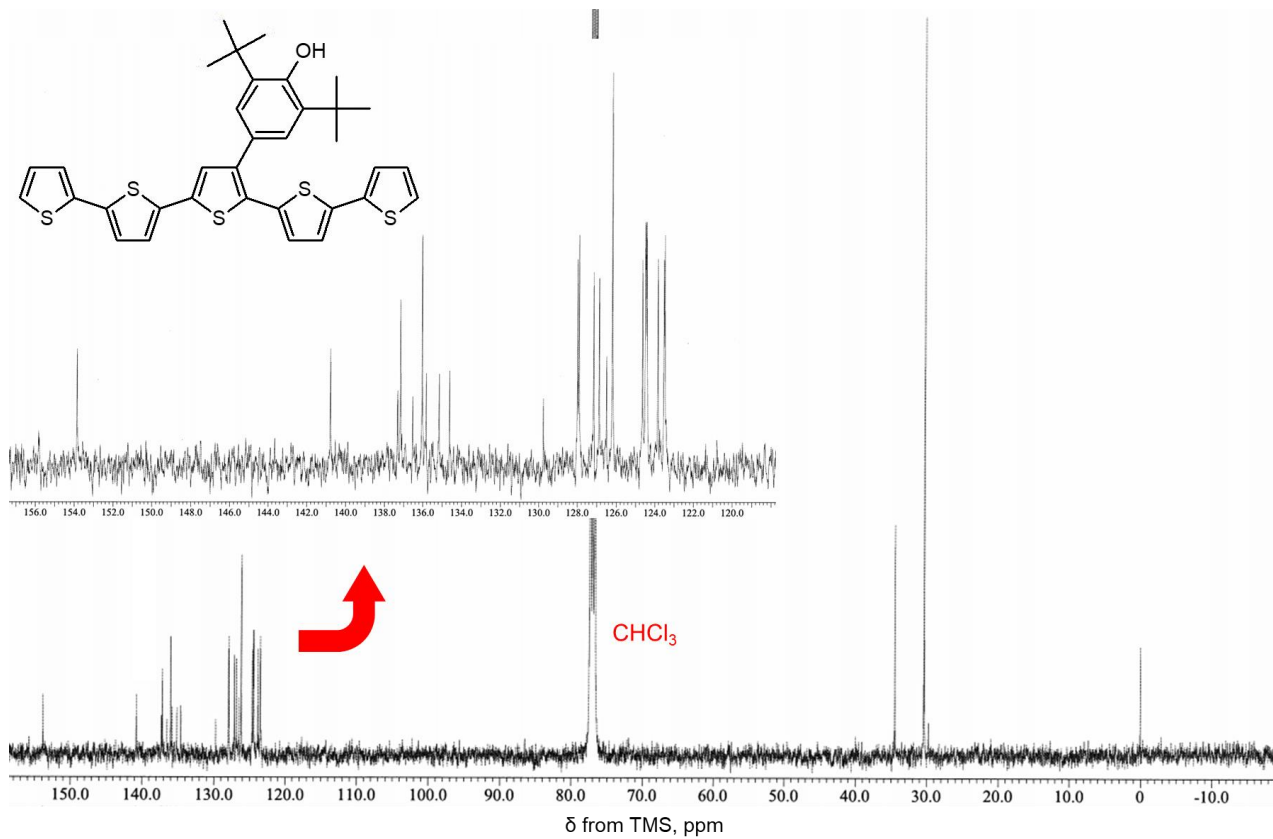

**Figure S10.** <sup>13</sup>C NMR data of 3''-(3,5-di-*tert*-butyl-4-phenoxy)-2,2':5',2'':5'',2''':5''',2''''-quinquethiophene (5TP) in CDCl<sub>3</sub>, at 100 MHz.



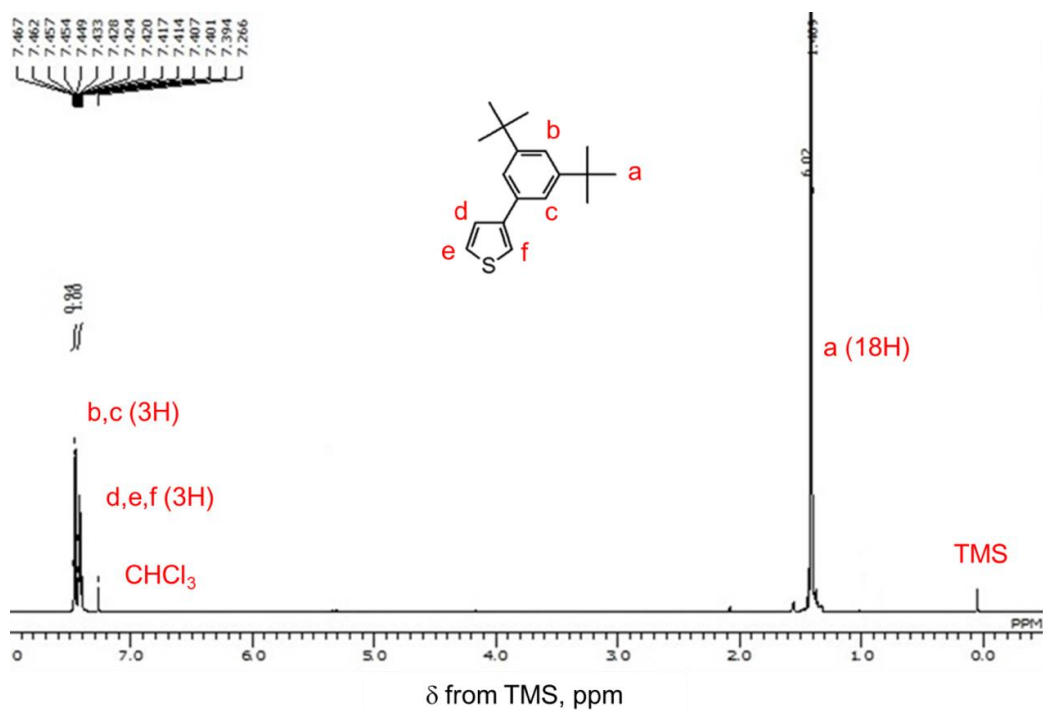

**Figure S11.**  $^1\text{H}$  NMR data for 3-(3,5-di-*tert*-butyl-phenyl)thiophene in  $\text{CDCl}_3$ , at 400 MHz.

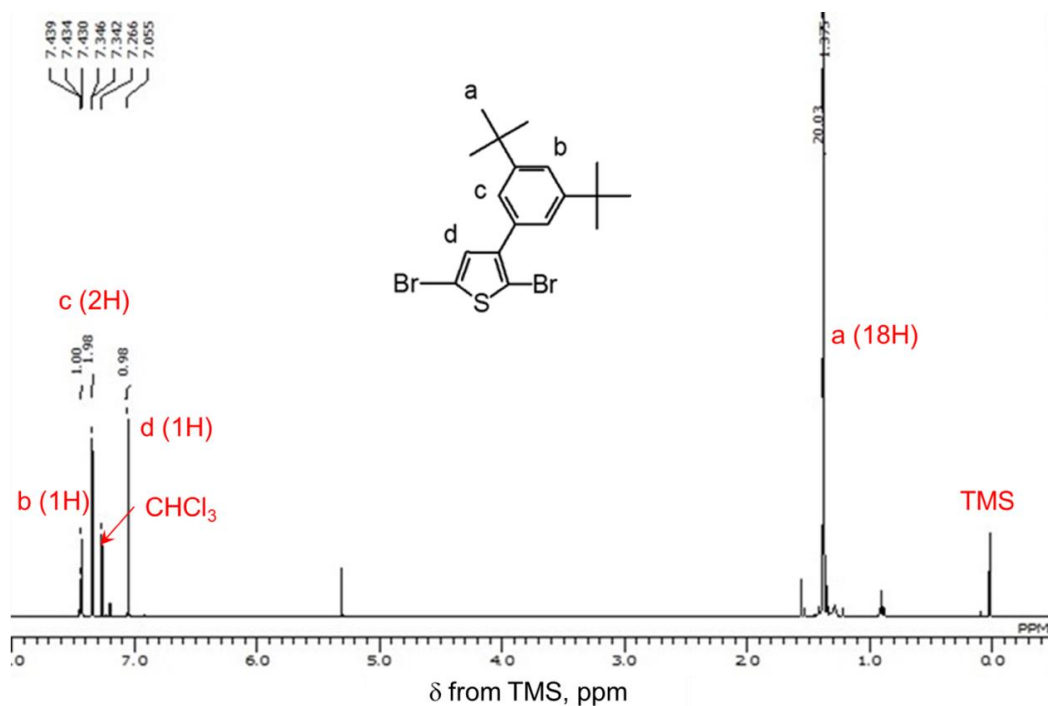

**Figure S12.**  $^1\text{H}$  NMR data for 2,5-dibromo-3-(3,5-di-*tert*-butyl-phenyl)thiophene in  $\text{CDCl}_3$ , at 400 MHz.

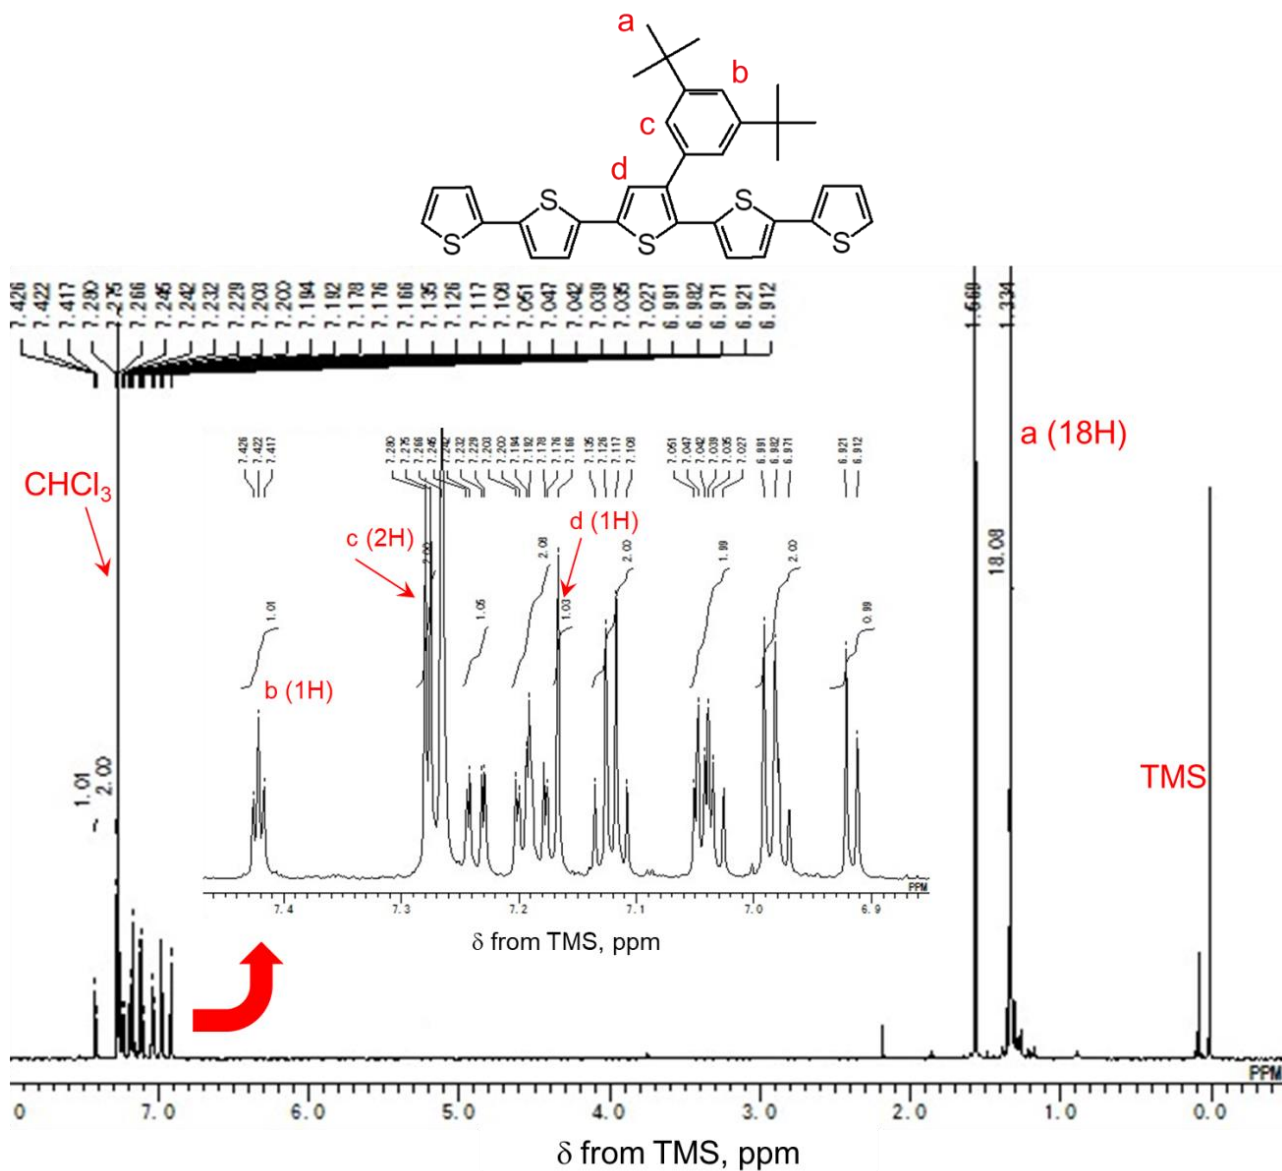

**Figure S13.** <sup>1</sup>H NMR data for 3''-(3,5-di-*tert*-butyl-phenyl)-2,2':5',2'':5'',2'''':5''',2''''-quinquethiophene (5TB) in CDCl<sub>3</sub>, at 400 MHz.

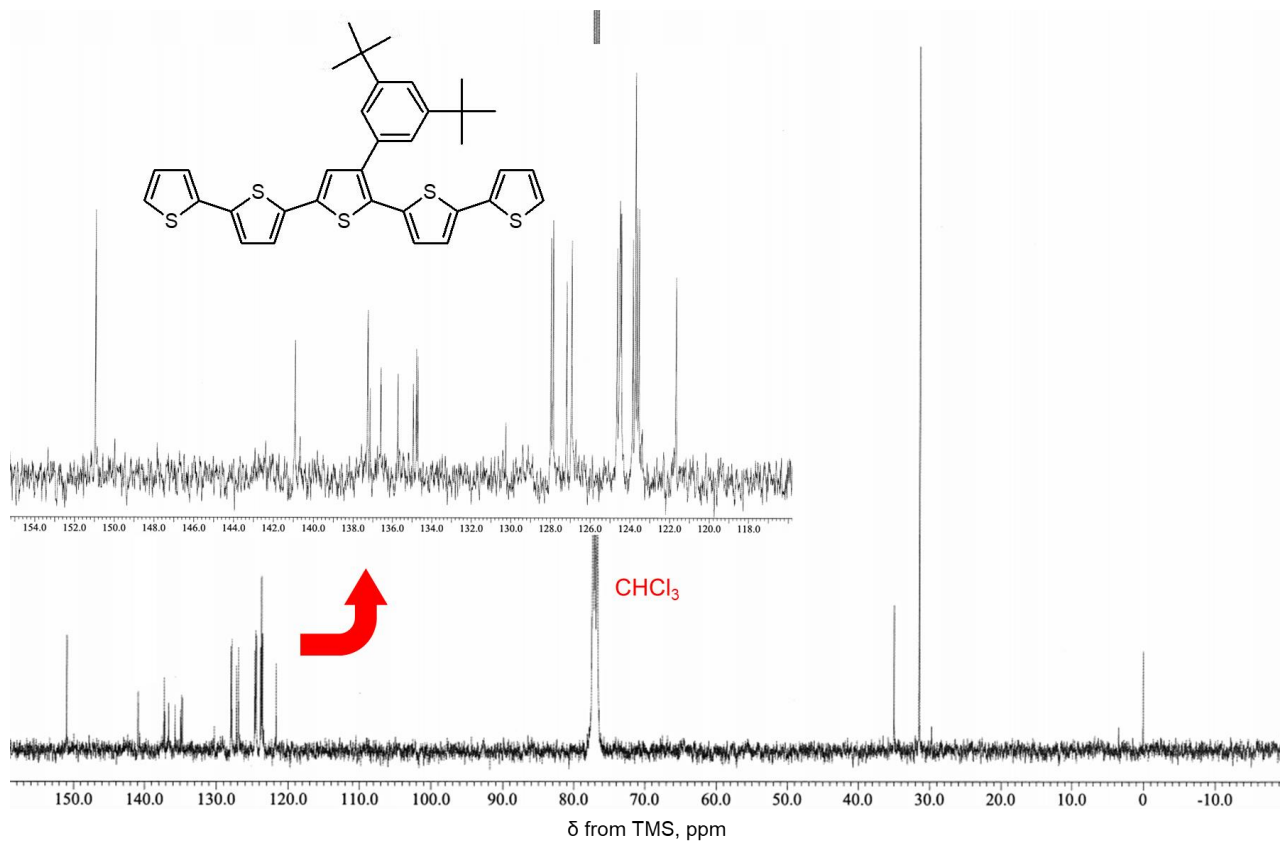

**Figure S14.**  $^{13}\text{C}$  NMR data for 3''-(3,5-di-*tert*-butyl-phenyl)-2,2':5',2'':5'',2''':5''',2''''-quinquethiophene (5TB) in  $\text{CDCl}_3$ , at 100 MHz.

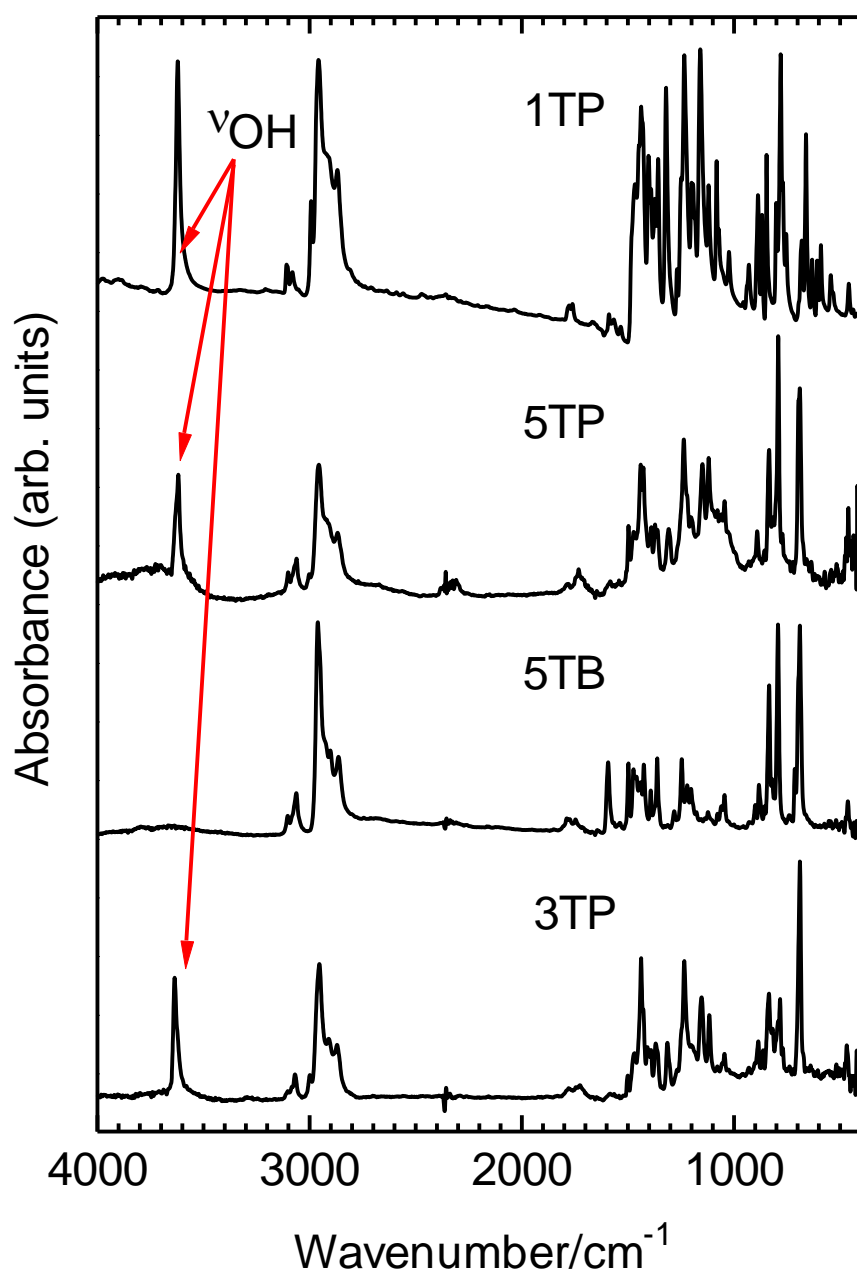

**Figure S15.** FT-IR spectra of 1TP, 5TP, 5TB and 3TP in KBr method.

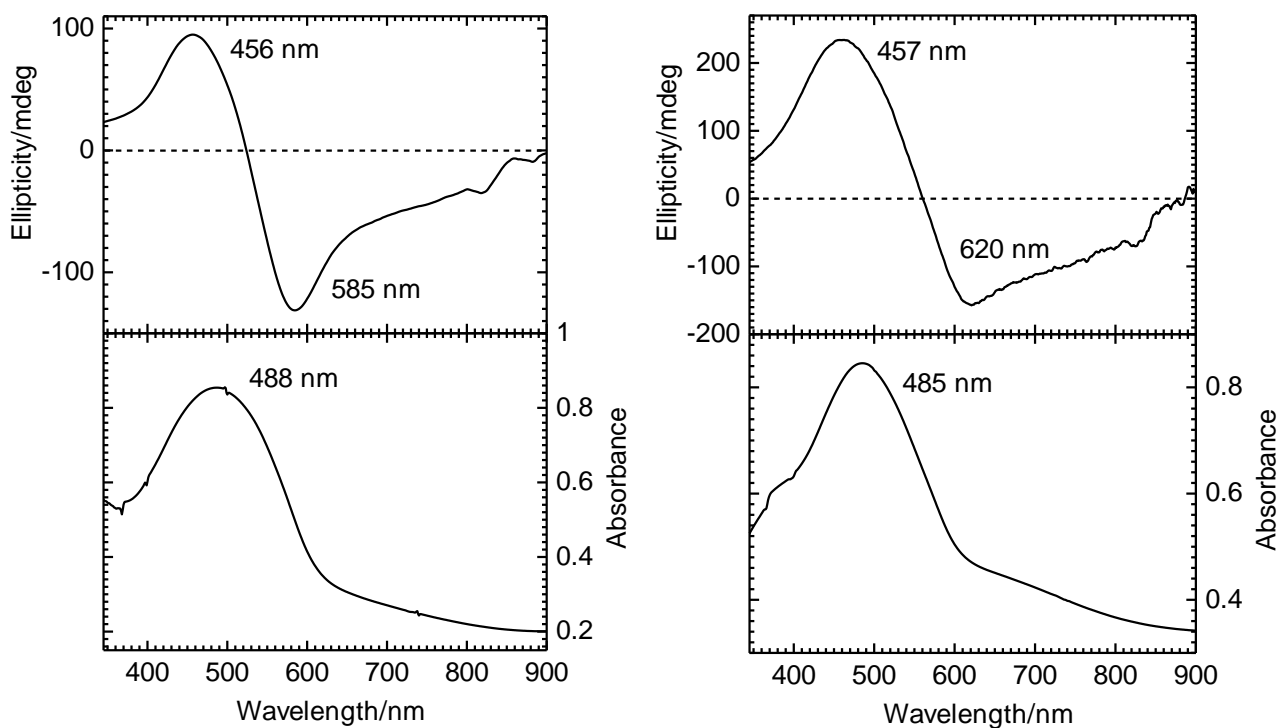

**Figure S16.** CD (top) and UV-vis optical absorption (bottom) spectra of (a) p5TP<sub>(OT)</sub>, (b) p5TB<sub>(OT)</sub> reduced by hydrazine vapor.

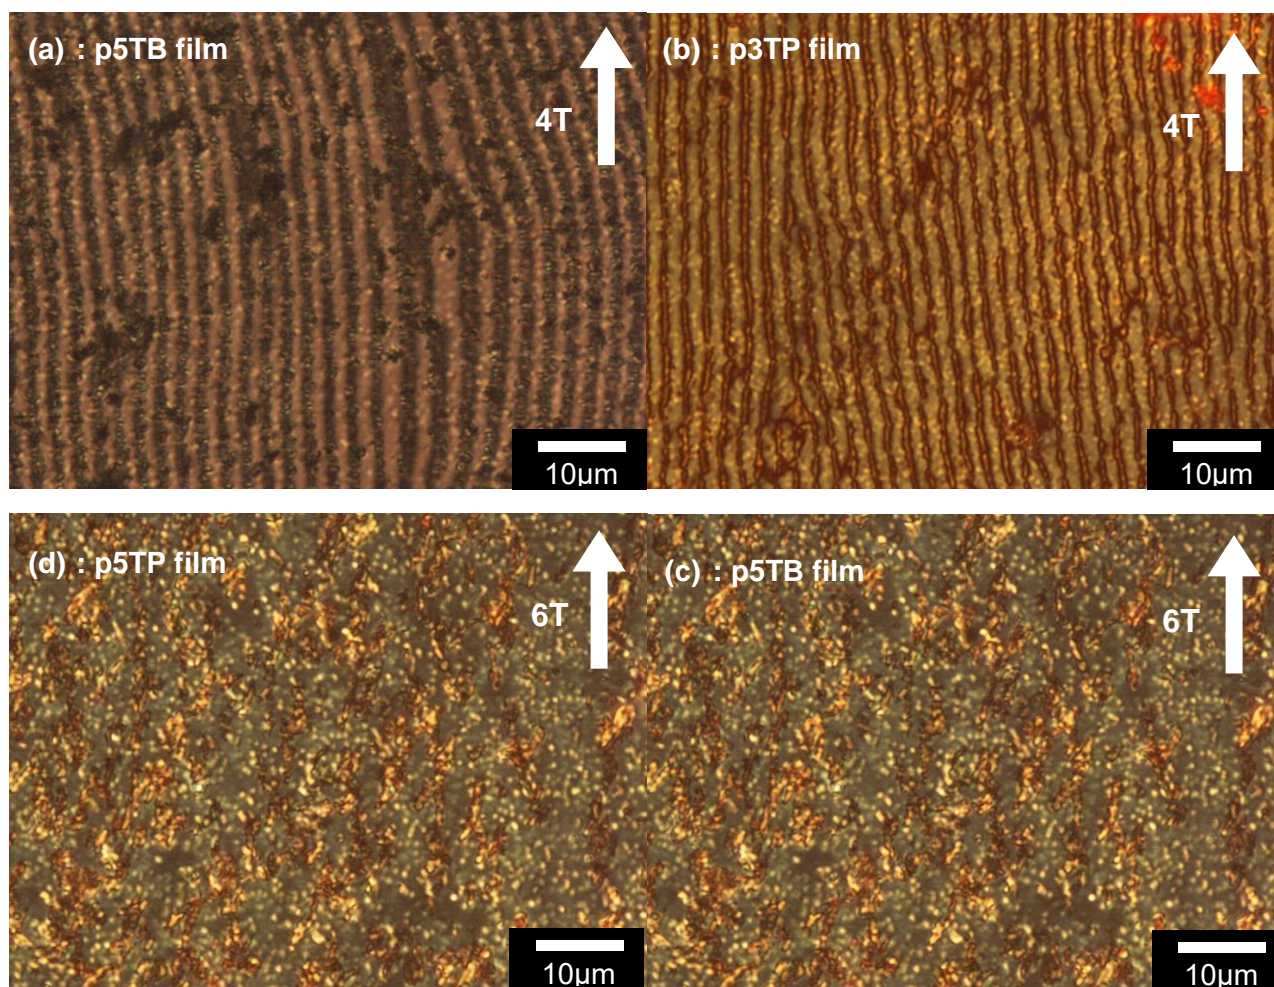

**Figure S17.** POM images of electrochemically prepared polymer films in CLC under magnetic field. p5TB prepared by electrochemical polymerization in CLC under magnetic field of (a) 4T (p5TB<sub>(4T)</sub>) and (d) 6T (p5TB<sub>(6T)</sub>). (b) p3TP prepared by electrochemical polymerization in CLC under magnetic field of 4T (p3TP<sub>(4T)</sub>). (c) p5TP prepared by electrochemical polymerization in CLC under magnetic field of 6T (p5TP<sub>(6T)</sub>).

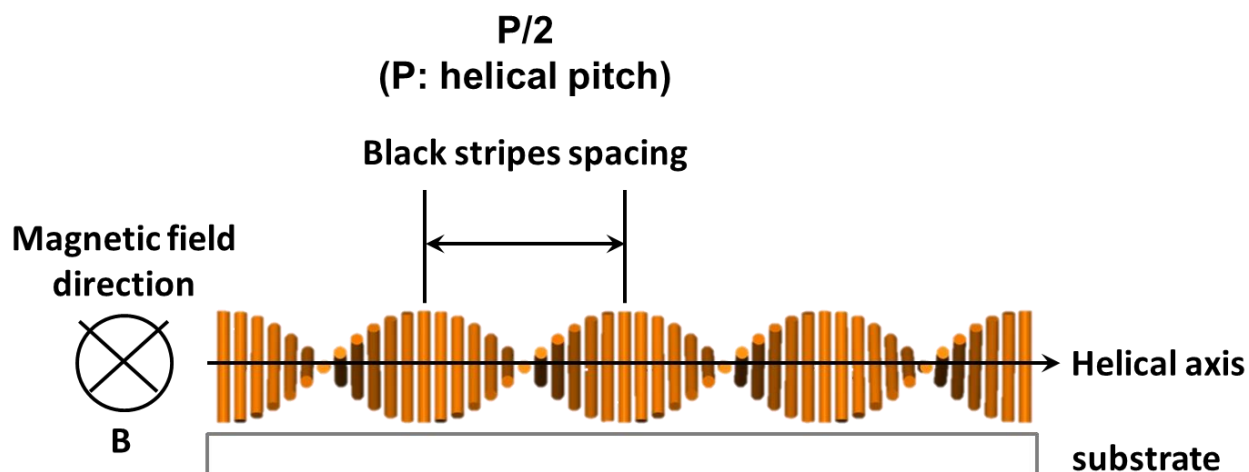

**Figure S18.** Conceptual image of the helical periodic structure of the CLC.

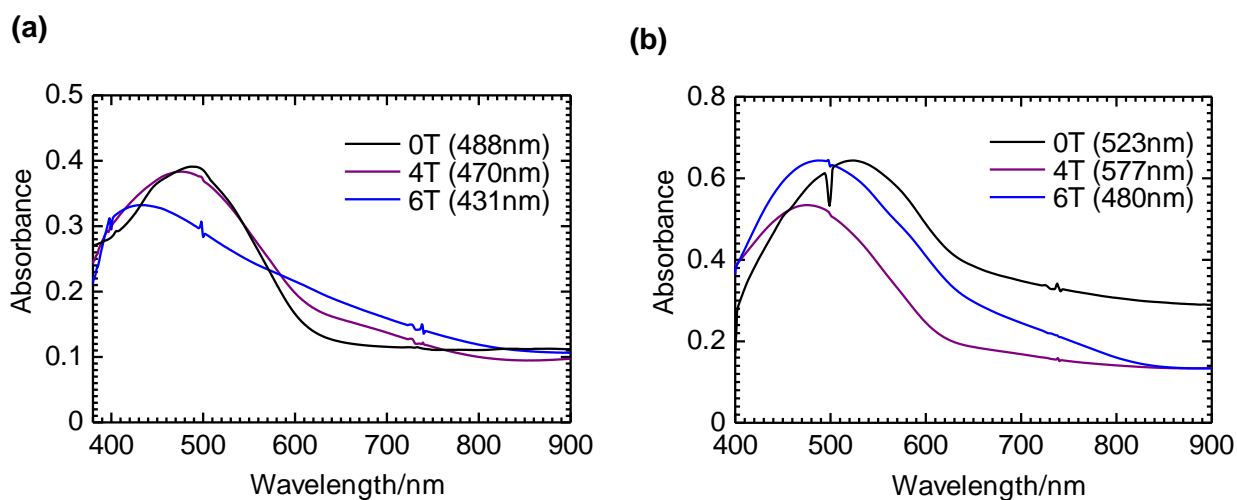

**Figure S19.** UV-vis spectra of (a) p5TP and (b) p3TP prepared in electrochemical polymerization in CLC under magnetic field (black line: 0T, purple line: 4T, blue line: 6T).

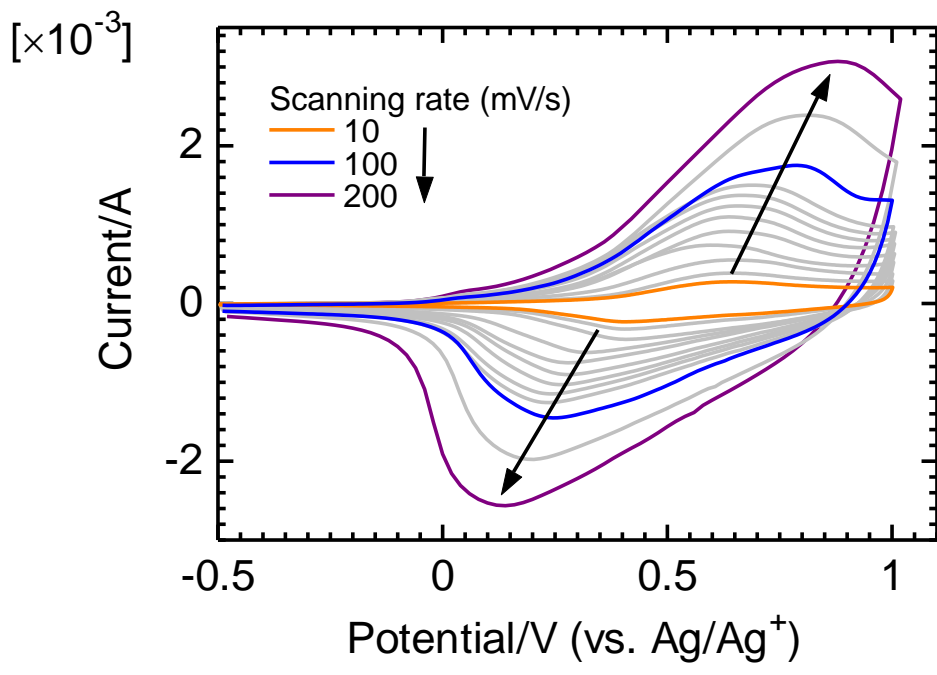

**Figure S20.** CV results for a p3TP<sub>(OT)</sub> film on ITO glass using 0.1M TBAP-acetonitrile solution at scan rates of 10, 20, 30, 40, 50, 60, 70, 80, 90, 100 and 200 mV/s.



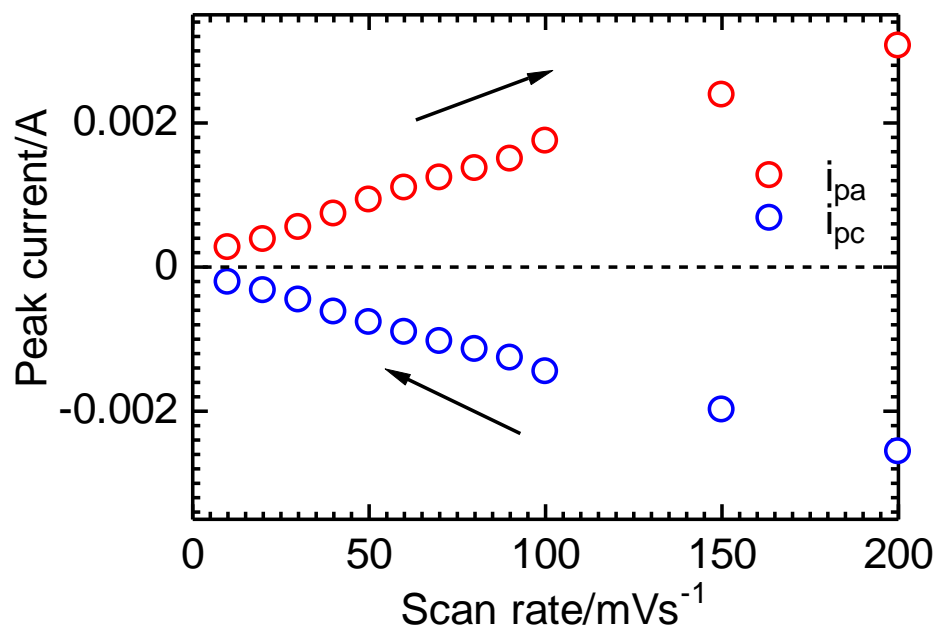

**Figure S21.** The redox property of p3TP<sub>(OT)</sub> films evaluated by plotting the intensity of the signal at each scan rate.

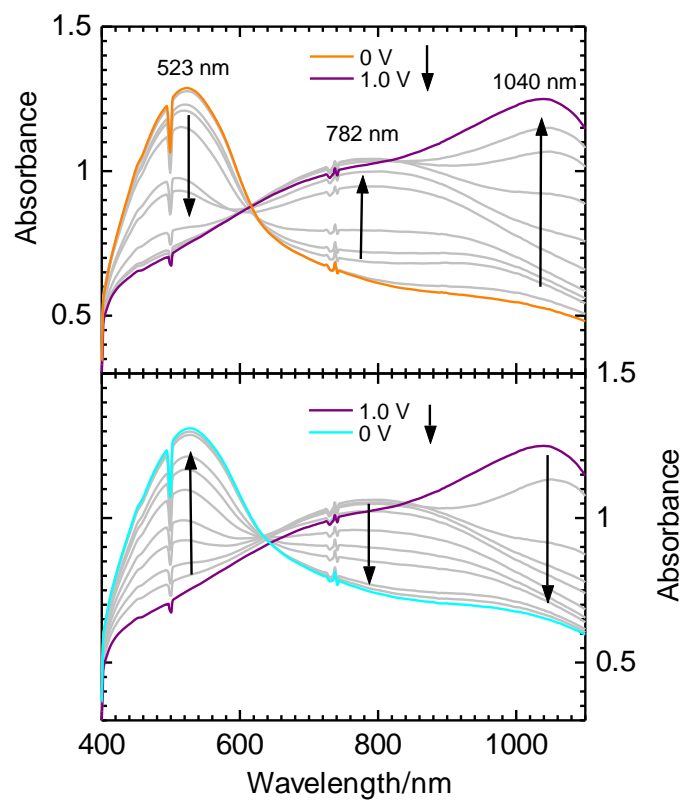

**Figure S22.** *In-situ* optical absorption spectra for a p3TP<sub>(OT)</sub> film in 0.1 M TBAP-acetonitrile solution at different voltages. UV-vis optical absorption spectra of a p3TP<sub>(OT)</sub> film during oxidation (upper) and reduction (bottom) between 1.0 V and 0 V at 0.1 V steps.

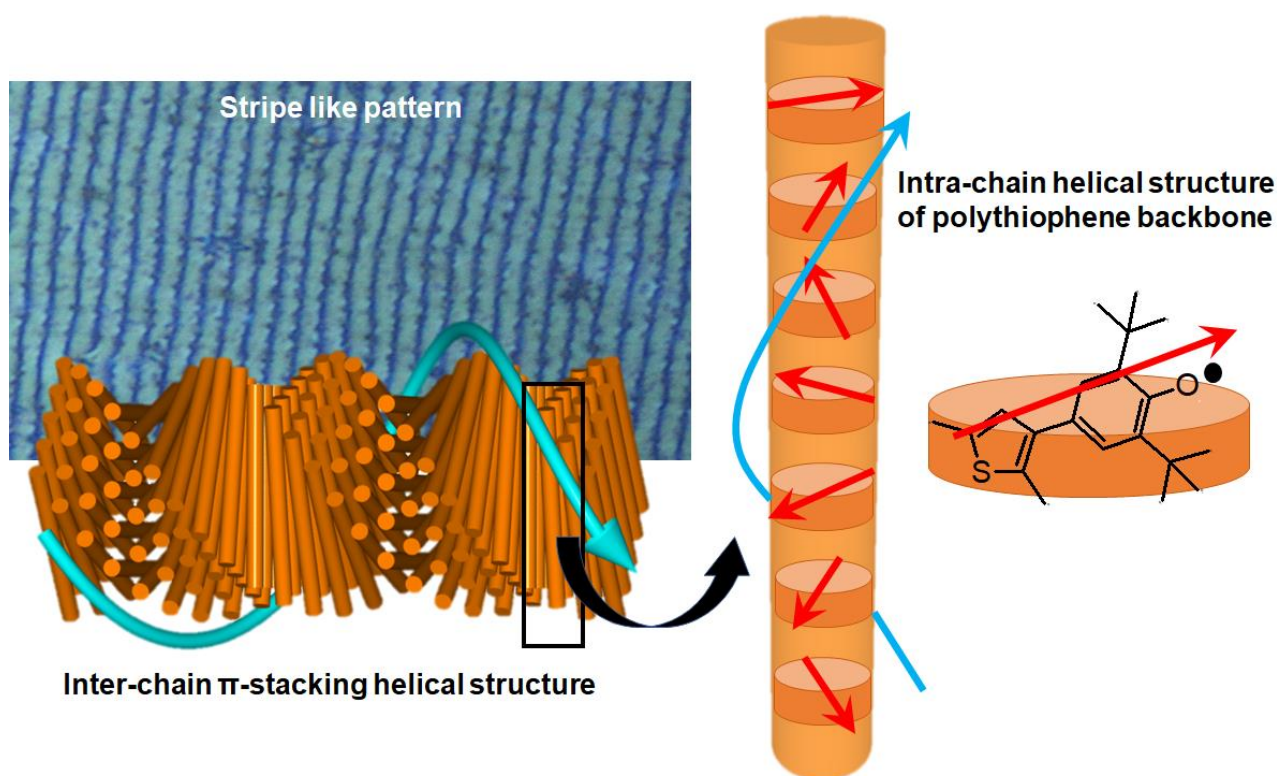

**Figure S23.** Plausible hierarchical helical structure of the polymer film. The polymer film synthesized in this study may have an interchain helical stacking structure and an intra-chain helical spin structure.

## Reference

- (1) Pankow, R. M.; Gobalasingham, N. S.; Munteanu, J. D.; Thompson, B. C. Preparation of semi-alternating conjugated polymers using direct arylation polymerization (DAP) and improvement of photovoltaic device performance through structural variation. *J. Polym. Sci.: Part A: Polym Chem* **2017**, *55*, 3370–3380.
- (2) Li, J. Y.; Chen, C. Y.; Lee, C. P.; Chen, S. C.; Lin, T. H.; Tsai, H. H.; Ho, K. C.; Wu, C. G. Unsymmetrical squaraines incorporating the thiophene unit for panchromatic dye-sensitized solar cells. *Org. Lett* **2010**, *12*, 5454–5457.
- (3) Gierke, W.; Harrer, W.; Kibste, B.; Kurreck, H.; Reusch, J. Über Galvinole und Galvinoxyle, II EPR-HFS- und elektronen-spektroskopische Untersuchung von Galvinoxyl-Mehrspeinsystemen. *Zeitschrift für Naturforschung. B* **1976**, *31*, 965–973.

(4) Yamamoto, T.; Hayashi, H.  $\pi$ -Conjugated soluble and fluorescent poly (thiophene-2, 5-diyl)s with phenolic, hindered phenolic and p-C<sub>6</sub>H<sub>4</sub>OCH<sub>3</sub> substituents. Preparation, optical properties, and redox reaction. *J. Polym. Sci.: Part A: Polym. Chem. Ed* **1997**, 35, 463–474.

(5) Hayashi, H.; Yamamoto, T. Synthesis of regioregular  $\pi$ -conjugated poly (thienyleneethynylene) with a hindered phenolic substituent. *Macromolecules* **1997**, 30, 330–332.
